# Supplementary material for: Evolutionarily conserved and conformationally constrained short peptides might serve as DNA recognition elements in intrinsically disordered regions
Source: Royal Society of Chemistry journal article supplement (doi:10.1039/c3mb70539k), 2014-02-10

## Supplementary information

### **Evolutionarily conserved and conformationally constrained short peptides might serve as DNA-recognition elements in intrinsically disordered regions**

**Nitish Tayal, Preeti Choudhary, Shashi B. Pandit, Kuljeet Singh Sandhu\***

Department of Biological Sciences  
Indian Institute of Science Education and Research (IISER) – Mohali,  
Knowledge City, Sector-81, SAS Nagar, Manauli PO 140306, India.

\*To whom correspondence should be addressed

Kuljeet Singh Sandhu  
Assistant Professor & Group Leader  
Department of Biological Sciences  
Indian Institute of Science Education and Research (IISER) – Mohali,  
Knowledge City, Sector 81, SAS Nagar, Manauli PO 140306, India.  
Ph: +91-9915013645  
Fax: +91-172-2240266, 2240124  
E-mail: [sandhuks@iisermohali.ac.in](mailto:sandhuks@iisermohali.ac.in)

## Supplementary figure legends

**Figure S1.** (A) Overlap of number of LDRs predicted by IUPred and FoldIndex algorithms. (B) Venn diagram for the % of CoREs ( $\text{FDR} \leq 0.01$ ) found in major life kingdoms represented in UniProt. (C) % distribution of random hexa-peptides picked from LDR containing proteins.

**Figure S2.** (A) Ramachandran plot showing the  $\phi$ - $\psi$  ranges for extended sheet (E), right handed helical (R) and left handed (L) conformations. Letter “U” signifies “unassigned”. [ $R=(\phi:-120^\circ$  to  $-10^\circ$ ;  $\psi:-120^\circ$  to  $20^\circ$ ),  $E=(\phi:-180^\circ$  to  $-60^\circ$ ;  $\psi: 60^\circ$  to  $180^\circ$ ),  $L=(\phi: 0^\circ$  to  $90^\circ$ ,  $\psi: -10^\circ$  to  $90^\circ)$ ]. (B) Conservation analysis for DSSP assigned secondary structures of CoREs and the adjacent regions. (C) Conservation analysis for the surface accessibility of CoREs and the adjacent regions. (D) Distributions of End-to-end CA distances for CoREs and neighboring regions of the same lengths.

**Figure S3.** Structural analyses of control peptides (scrambled CoREs). (A) End to end distances, (B) deviation in end-to end distances and, (C) root mean squared deviation of superimpositions of scrambled CoREs found in Protein Data Bank. P-values were calculated using Mann-Whitney U test. (D) Examples of control peptides.

**Figure S4.** (A) Enrichment of protein domains in CoRE containing human proteins, when compared to LDR containing human proteins. The analysis was done using FatiGO. (B) Prediction of DNA Binding potential of CoREs in yeast and fruit-fly. (C) Predictions for the effect of mutation using SIFT (left panel, number of amino acid substitutions showing the SIFT score  $< 0.05$ ). P-values were calculated using Mann-Whitney U test.

**Figure S5.** Additional worked-out examples for DNA binding function of CoREs . (A) DNA-bound examples of CoREs. DNA is represented as blue colored space-filled model. CoRE in the protein is highlighted in red color. (B)  $\Delta\Delta G$  values (methods) for change in DNA binding upon substitution mutations.  $\Delta\Delta G$  values for mutations in CoRE regions are highlighted in red.

**Figure S6.** (A-D) Bibliographic examples of CoREs, their DNA binding potential and mutations therein. Upper panel in each figure shows predicted intrinsic disorder (red: disordered, grey: ordered) and lower panel shows magnified CoRE region, DNA binding residues (red, upper case) as predicted by BindN/DP-Bind and known loss-of-function mutations.

**Figure S7.** (A-B) The case study of AT-Hook. (A) Conformations of RGRP motifs alignable ( $\text{RMSD} < 1 \text{ \AA}$ ) to DNA unbound (upper panel) and bound conformations (lower panel, PDB: ). DNA-binding face is indicated in orange colour. Small solid box indicates glycyl residue. Inset picture in lower panel shows DNA bound structure of AT-hook (PDB: 2EZD) (B) Ramachandran plots of glycine, proline and arginine residues occurring in RGRP motifs in DNA unbound (upper panel) and DNA-bound (lower panel) conformation in non-homologous protein structures. (C)  $\delta_l/\delta_r$  ratio for the glycines in the DNA bound and unbound conformations of DNA-binding sites in all the DNA-protein complexes available in PDB.

Figure S1

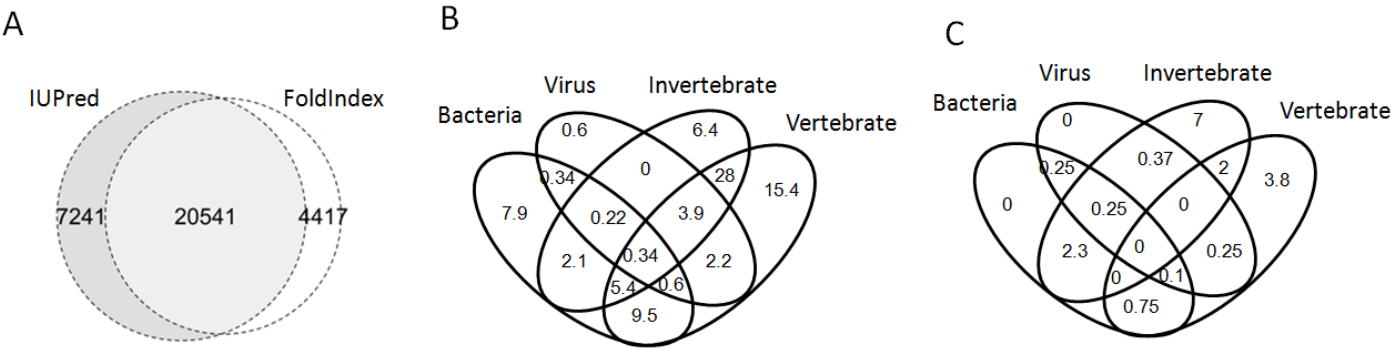

Figure S2

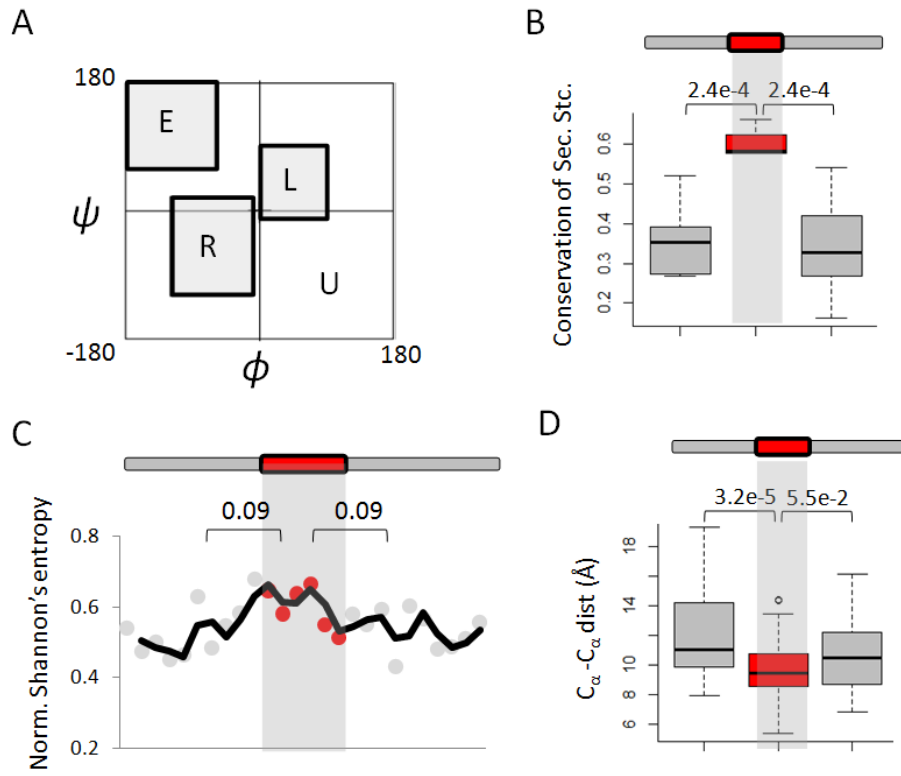

**Figure S3**

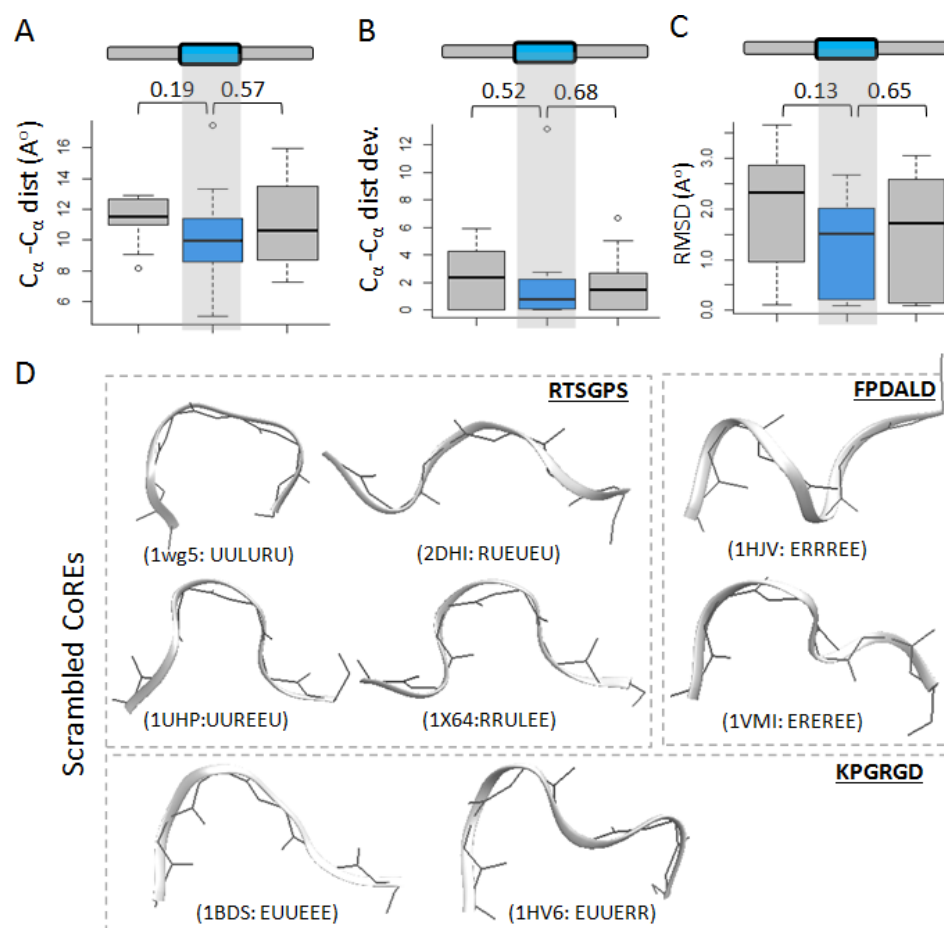

Figure S4

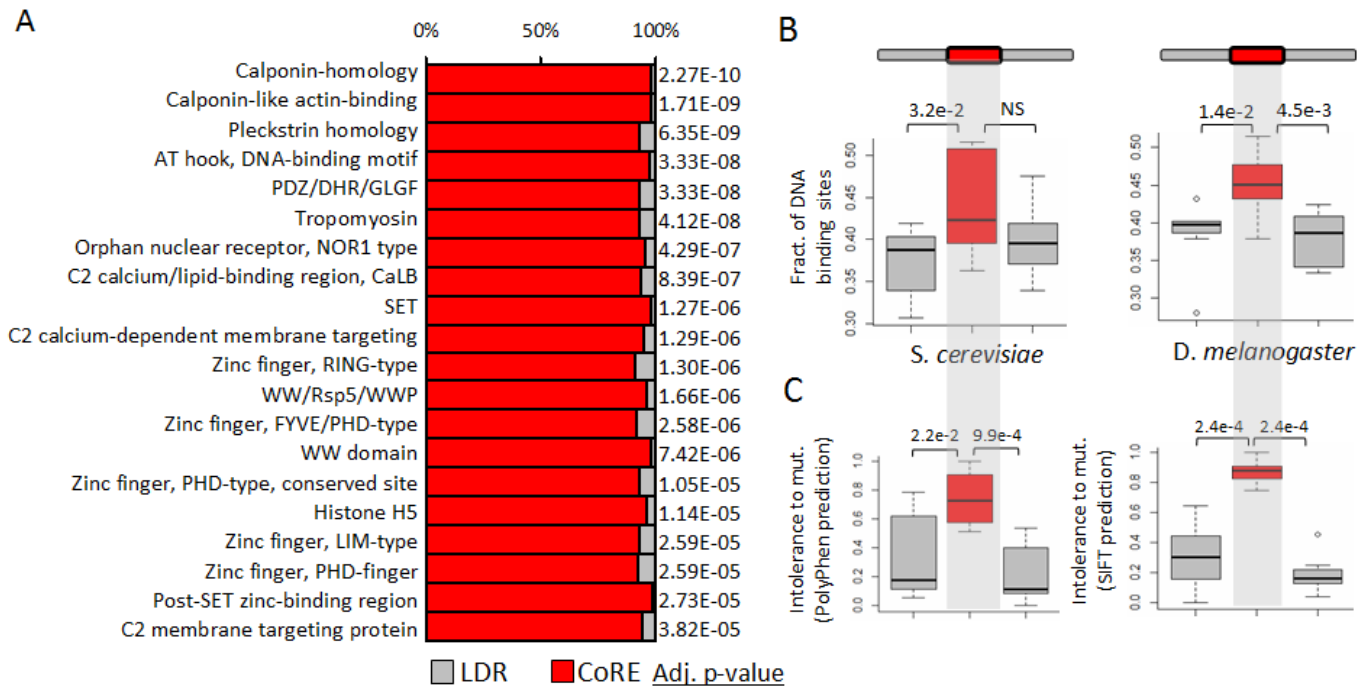

Figure S5

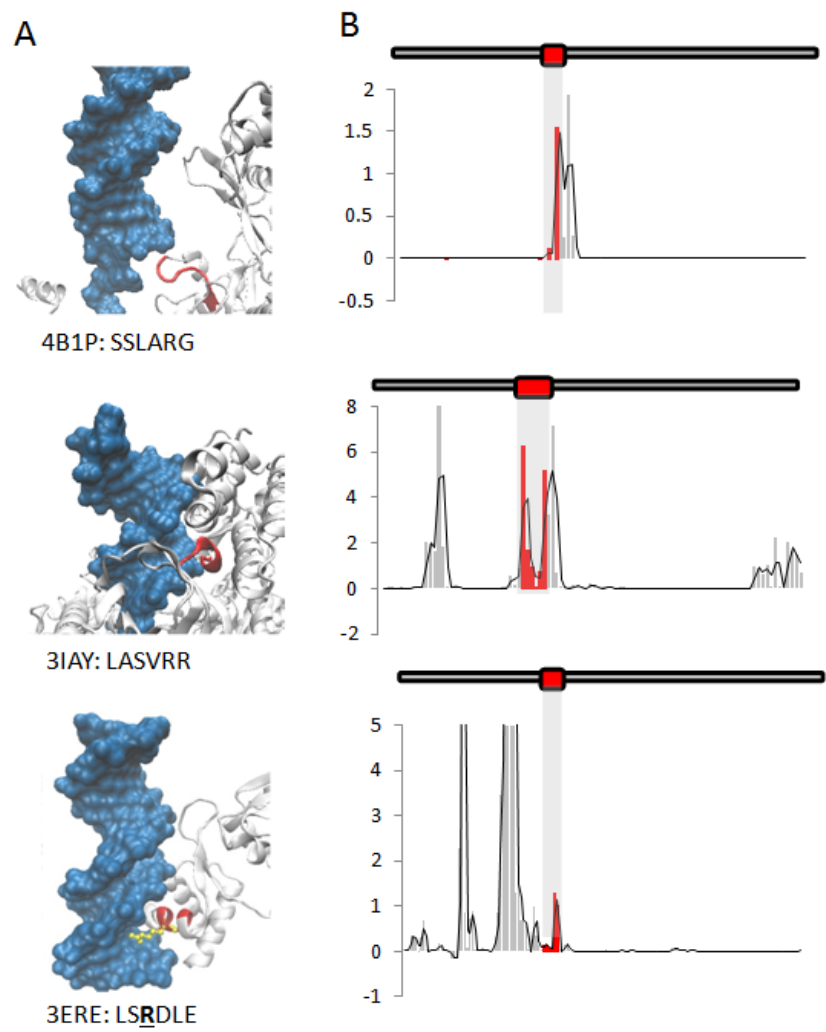

Figure S6

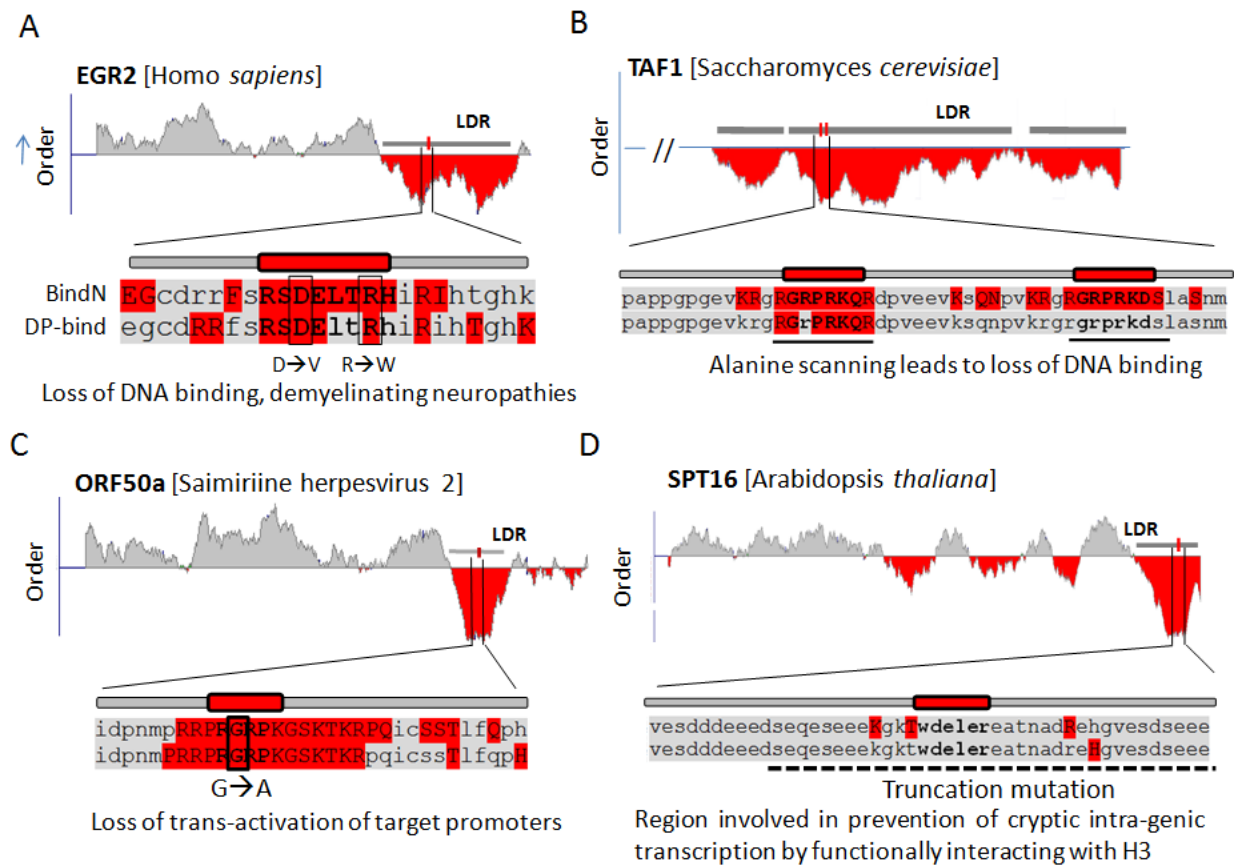



Figure S7

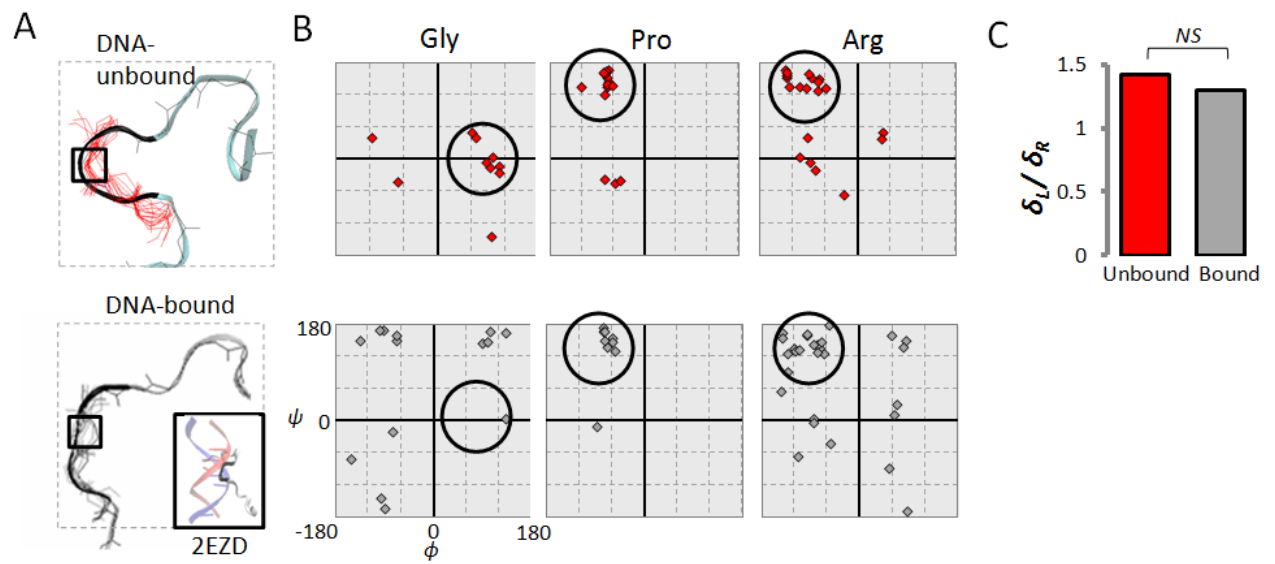

Supplement: c3mb70539k1.pdf [file c3mb70539k1.pdf]
